# Supplementary material for: Identification of Peanut AhMYB44 Transcription Factors and Their Multiple Roles in Drought Stress Responses
Source: MDPI journal article supplement (doi:10.3390/plants11243522), 2022-12-14
Supplement: s1 [file s1]

Table S2 Primers used in this study

| Name          | Forward primer sequence                             | Reverse primer sequence                           | Experiments              |
|---------------|-----------------------------------------------------|---------------------------------------------------|--------------------------|
| AhMYB44-01    | 5'-CCTTACCTACTTCGCTTCT-3'                           | 5'-CATTTCTACTAATAACACCC-3'                        | gene isolation           |
| AhMYB44-11    | 5'-CTTTATGGTCTTGTCTTCGT-3'                          | 5'-CTTTTCTTATCATTTCTTGC-3'                        | gene isolation           |
| AhMYB44-05    | 5'-CCCCACCCTTTATTTTAT-3'                            | 5'-AACAGGGGATAAACACGA-3'                          | gene isolation           |
| AhMYB44-15    | 5'-ACCACCAACACAACATAACAC-3'                         | 5'-AACAGGGGATAAACACGAAG-3'                        | gene isolation           |
| AhMYB44-06    | 5'-TTATCTTTCGGTTTCCCCA-3'                           | 5'-TTTTTACCTCTCTAATCCGT-3'                        | gene isolation           |
| AhMYB44-16    | 5'-GTGCTCTGTTTCGCTTTT-3'                            | 5'-AAACTGTTCTCTGCTCAA-3'                          | gene isolation           |
| Pro-MYB44-01  | 5'-TATTGCCTTTGTTTCATACAACGAA-3'                     | 5'-ACTGCTTAGCTTCCTTTGTATTG                        | promoter isolation       |
| Pro-MYB44-11  | 5'-GTTCTTGTAACAACCTGAGGC-3'                         | 5'-AGTGCTTAGTTTCTTTTGTGTTG-3'                     | promoter isolation       |
| Pro-MYB44-05  | 5'-GTACGAGTAACAGAAATAGATACGG-3'                     | 5'-CTCTCTCTTATCTTTTTTTCCTCC-3'                    | promoter isolation       |
| Pro-MYB44-15  | 5'-TGGGTAGTATATGTACGATGTACGA-3'                     | 5'-CTCTCTCTTATCTTTTTTTCCTCCT-3'                   | promoter isolation       |
| Pro-MYB44-06  | 5'-TCTGAATTAACTCTGCCATTAGAC-3'                      | 5'-TGCAATAAGAATCAAATCAAATTCC-3'                   | promoter isolation       |
| Pro-MYB44-16  | 5'-ATCAATACTAAAGCAAAACCACAAT-3'                     | 5'-TGCAATAAGAATAAAATCAAATTCC-3'                   | promoter isolation       |
| Q-MYB44-01/11 | 5'-ATTGCCATCGCCACAACATC-3'                          | 5'-CACCAGCAGCCTGAAAACACAT-3'                      | qRT-PCR                  |
| Q-MYB44-05/15 | 5'-CCGTTGACTGCCATACCTCTG-3'                         | 5'-CCGCTCCATTATTCTGCTTCG-3'                       | qRT-PCR                  |
| Q-MYB44-06/16 | 5'-GTGCCGCTCTTCTGCTTCTGA-3'                         | 5'-CGGGCTGCTAGGCGTGGTAA-3'                        | qRT-PCR                  |
| Q-AhACTIN11   | 5'-TTGGAATGGGTCAGAAGGAT-3'                          | 5'-AGTGGTGCCTCAGTAAGAAGC-3'                       | qRT-PCR                  |
| Q-AtACTIN2    | 5'-GGTAACATTGTGCTCAGTGGTGG-3'                       | 5'-AACGACCTTAATCTTCATGCTGC-3'                     | qRT-PCR                  |
| Q-AtPP2CA     | 5'-TCTGAGAATCATCATTTCTACGGTGT-3'                    | 5'-CTCGTTGGCTAACTTCTTATCCATT-3'                   | qRT-PCR                  |
| Q-AtABI1      | 5'-AGAAACCGATGCTCTGCGATGGTGATAC-3'                  | 5'-GTTAGCGACGAAGATGTGAGACGGG-3'                   | qRT-PCR                  |
| Q-AtABA1      | 5'-GATTCTGGAGATAAGGTACTGTGG-3'                      | 5'-CCGTGTAACAAGGTAGCCTGAAT-3'                     | qRT-PCR                  |
| Q-AtABA2      | 5'-GCTTGTCTGTGTCAATAGTGAGGCA-3'                     | 5'-GATCAGAGGAAAAAGTTGGAGAAAG-3'                   | qRT-PCR                  |
| Q-AtP5CS1     | 5'-TCTTATGGCTTACTATGAGACTATGTTTGAC-3'               | 5'-TATGGGCTCTTCGGGTGCTAATAG-3'                    | qRT-PCR                  |
| Q-AtRD29A     | 5'-GTCTGCCGTGACGACGAAGTTAC-3'                       | 5'-TCCTTCTCTCTTCTCTCCTCCAA-3'                     | qRT-PCR                  |
| Q-AtCBF1      | 5'-TGTCTCAACTTCGCTGACTCGGC-3'                       | 5'-ACCTTCGCTCTGTTCGGGTGTATAA-3'                   | qRT-PCR                  |
| Q-AtCOR15A    | 5'-GGTAAAGCAGGAGAGGCTAAGGATG-3'                     | 5'-AAGAATGTGACGGTGACTGTGGATA-3'                   | qRT-PCR                  |
| BD-MYB44-05   | 5'-TGGCCATGGAGGCCGAATTCATGAATACCGCTACTAGT-3'(EcoR1) | 5'-CGCTGCAGGTCGACGGATCCTTACGAATCGATCCT-3'(BamH1)  | Transcriptional activity |
| BD-MYB44-11   | 5'-TGGCCATGGAGGCCGAATTCATGGCCATGTCTAGA-3'(EcoR1)    | 5'-CGCTGCAGGTCGACGGATCCTCACGAGTTGACTTTG-3'(BamH1) | Transcriptional activity |

|             |                                                  |                                                  |                          |
|-------------|--------------------------------------------------|--------------------------------------------------|--------------------------|
| BD-MYB44-16 | 5'-TGGCCATGGAGGCCGAATTCATGGATCGAGTTAAG-3'(EcoR1) | 5'-CGCTGCAGGTCGACGGATCCTTACCTCTCTATTCC-3'(BamH1) | Transcriptional activity |
| SL-MYB44-05 | 5'-GCTCTAGAATGAATACCGCTACTAGTA-3'(XbaI)          | 5'-GGGGTACCCGAATCGATCCTGCTAATC-3'(KpnI)          | Subcellular localization |
| SL-MYB44-11 | 5'-GGACTAGTATGGCCATGTCTAGAAGAG-3'(SpeI)          | 5'-GGGGTACCCGAGTTGACTTTGCTAATC-3'(KpnI)          | Subcellular localization |
| SL-MYB44-16 | 5'-GCTCTAGAATGGATCGAGTTAAGGGC-3'(XbaI)           | 5'-GGGGTACCCCTCTCTATTCCGTTTCTA-3'(KpnI)          | Subcellular localization |
| TS-MYB44-05 | 5'-CCCAAGCTTATGAATACCGCTACTAGTA-3'(HindIII)      | 5'-GGGGTACC TTACGAATCGATCCTGC-3'(KpnI)           | Transformation           |
| TS-MYB44-11 | 5'-CCCAAGCTTATGGCCATGTCTAGAAG-3'(HindIII)        | 5'-GACTAGTTCACGAGTTGACTTTG-3'(SpeI)              | Transformation           |
| TS-MYB44-16 | 5'-CCCAAGCTTATGGATCGAGTTAAGG-3'(HindIII)         | 5'-GACTAGTTTACCTCTCTATTCC-3'(SpeI)               | Transformation           |
